# Supplementary material for: Optimal Response to Quorum-Sensing Signals Varies in Different Host Environments with Different Pathogen Group Size
Source: PubMed Central journal article supplement (PMC7267880; doi:10.1128/mbio.00535-20), 2020-06-02

**Supplementary Figure S1.** Competition between plasmid borne plcR/papR constructs and the wild type Group I strain in insects. These experiments qualitatively repeat those in the main body: positive frequency dependent occurred in one of these pairwise competition experiments. Comparisons between the pp IV / pp I experiment here and in the main body suggests that the wild type chromosomal PlcR / PapR system is slightly more competitive. Data are means  $\pm$  SE with fitted models for each competition treatment.

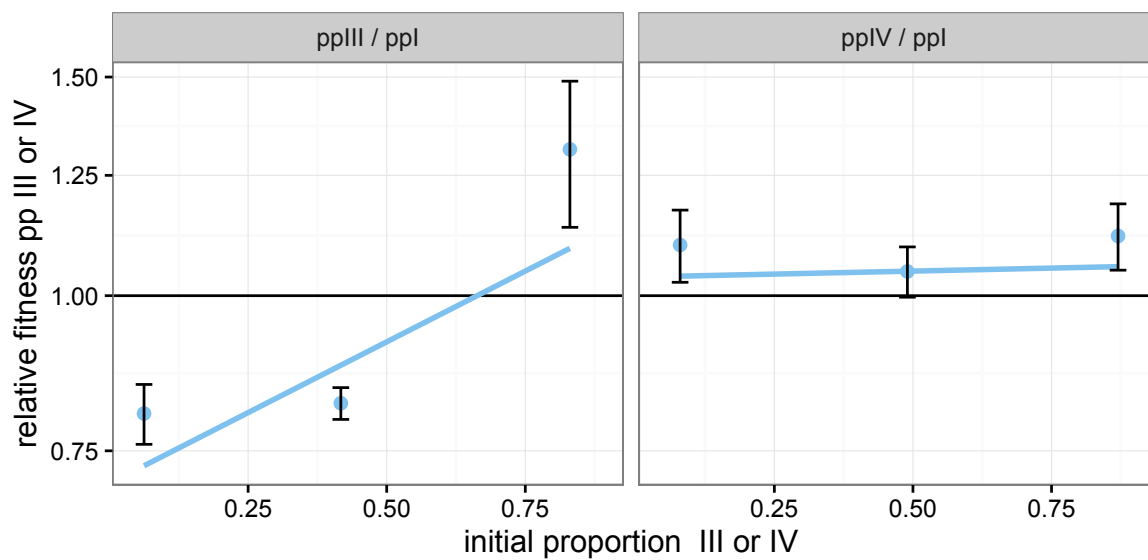

Supplement: mBio.00535-20-sf001.pdf [file mBio.00535-20-sf001.pdf]
